# Supplementary material for: Perceptions of Information and Communication Technology as Support for Family Members of Persons With Heart Failure: Qualitative Study
Source: PubMed Central journal article supplement (PMC6664659; doi:10.2196/13521), 2019-07-16
Supplement: jmir_v21i7e13521_app1.pdf [file jmir_v21i7e13521_app1.pdf]

---

## **Interview guide**

---

- Tell us your name and also something about your relationship to the person with heart failure close to you...
  - Can you tell us about your everyday life as a family member of someone with heart failure?
  - What do you think supporting someone might involve?
  - Do you have any experience in providing practical support for your family member?
  - Do you have any experience in providing information to support your family member?
  - Do you have any experience in strengthening or confirming your family member in what is said or done?
  - Is giving emotional support something that you have experience of?
  - Has your role as an informal carer changed over time?
  - What do you do in everyday life to stay healthy/take care of yourself?
  - What do you imagine internet technology could support you with in your daily life as a family member of someone with heart failure?
-
